# Supplementary material
Source: PubMed Central journal article supplement (PMC9192151)

# A novel mesenchymal-associated transcriptomic signature for risk-stratification and therapeutic response prediction in colorectal cancer

Takatoshi Matsuyama, Raju Kandimalla, Toshiaki Ishikawa, Naoki Takahashi, Yasuhide Yamada, Masamichi Yasuno, Yusuke Kinugasa, Torben Frostrup Hansen, Marwan Fakih, Hiroyuki Uetake, Balázs Gyórfy, and Ajay Goel

## Supplementary Online Content

### Supplementary Table S1:

Clinicopathological characteristics of in-house training and validation cohorts

### Supplementary Table S2:

Primer sequence IDs

### Supplementary Table S3:

The coefficients of seven genes MATS classifier in the cox regression model

### Supplementary Table S4:

The list of candidate genes, which have positive correlation with VIM in our laser capture micro dissected transcriptomic data

### Supplementary Table S5:

The list of candidate EMT genes which were upregulated in cancer vs. normal and these were used for lasso cox regression model

### Supplementary Table S6:

The AUC of each candidate gene for identifying CMS4 subtype in six publicly available datasets

### Supplementary Figure S1:

Study Design

### Supplementary Figure S2:

The association between each MATS gene and CMS status in GSE39582 dataset.

### Supplementary Figure S3:

The association between each MATS gene and CMS status in GSE17536 dataset.

### Supplementary Figure S4:

The association between each MATS gene and CMS status in GSE33113 dataset.

### Supplementary Figure S5:

The association between each MATS gene and CMS status in TCGA RNA seq dataset.

### Supplementary Figure S6:

The association between each MATS gene and CMS status in TCGA microarray dataset.

### Supplementary Figure S7:

The association between each MATS gene and CMS status in GSE104645 dataset.

### Supplementary Figure S8:

Association of MATS with TP53, BRAF and KRAS gene mutations status.

**Supplementary Figure S9:**

Survival analyses in stage II, and stage III patients in the validation cohort.

**Supplementary Table S1:** Clinicopathological characteristics of in-house training and validation cohorts

|                                 |              | Training cohort N (%)<br>(N=142) | Validation cohort N (%)<br>(N=286) |
|---------------------------------|--------------|----------------------------------|------------------------------------|
| Gender                          |              |                                  |                                    |
|                                 | Male         | 84 (59)                          | 162 (57)                           |
|                                 | Female       | 58 (41)                          | 124 (43)                           |
| Age                             |              |                                  |                                    |
|                                 | Mean±SD      | 59 ±10                           | 68 ±11                             |
| Location                        |              |                                  |                                    |
|                                 | Rectum       | 71 (50)                          | 102 (36)                           |
|                                 | Left colon   | 47 (33)                          | 89 (31)                            |
|                                 | Right colon  | 24 (17)                          | 95 (33)                            |
| Size                            |              |                                  |                                    |
|                                 | Mean±SD (mm) | 49 ±17                           | 53 ±37                             |
| Tumor grade                     |              |                                  |                                    |
|                                 | Low          | 132 (93)                         | 261 (91)                           |
|                                 | High         | 10 (7)                           | 25 (9)                             |
| T stage                         |              |                                  |                                    |
|                                 | T4           | 41 (29)                          | 88 (31)                            |
|                                 | T1-3         | 101 (71)                         | 198 (69)                           |
| Lymphovascular invasion         |              |                                  |                                    |
|                                 | Absent       | 39 (27)                          | 22 (8)                             |
|                                 | Present      | 103 (73)                         | 263 (92)                           |
|                                 | unknown      | 0                                | 1 (0)                              |
| No. of lymphnode examined       |              |                                  |                                    |
|                                 | <12          | 13 (9)                           | 50 (17)                            |
|                                 | 12 or more   | 129 (91)                         | 234 (82)                           |
|                                 | unavailable  | 0                                | 2 (1)                              |
| TNM stage                       |              |                                  |                                    |
|                                 | II           | 54 (38)                          | 161 (56)                           |
|                                 | III          | 88 (62)                          | 125 (44)                           |
| Adjuvant therapy                |              |                                  |                                    |
|                                 | No           | 73 (51)                          | 187 (65)                           |
|                                 | Yes          | 69 (49)                          | 99 (35)                            |
| MSI status                      |              |                                  |                                    |
|                                 | MSI-H        | -                                | 25 (9)                             |
|                                 | MSS, MSH-L   | -                                | 251 (88)                           |
|                                 | unavailable  | -                                | 10 (3)                             |
| Median follow up period (Month) |              | 71                               | 47                                 |

**Supplementary Table S2:** Primer IDs from Thermo Fisher Scientific

| Gene Name | Assay ID      | Amplicon Length |
|-----------|---------------|-----------------|
| FN1       | Hs01549972_m1 | 63bp            |
| COL3A1    | Hs00943809_m1 | 65bp            |
| PRR16     | Hs01083087_m1 | 67bp            |
| POSTN     | Hs01566750_m1 | 67bp            |
| BCAT1     | Hs00398962_m1 | 74bp            |
| COL1A2    | Hs01028956_m1 | 71bp            |
| DKK3      | Hs00951304_m1 | 64bp            |
| FSTL1     | Hs00907496_m1 | 64bp            |

**Supplementary Table S3:** The coefficients of seven genes MATS classifier in the cox regression model

| <b>COL1A2</b> | <b>COL3A1</b> | <b>FN1</b> | <b>POSTN</b> | <b>FSTL1</b> | <b>BCAT1</b> | <b>DKK3</b> |
|---------------|---------------|------------|--------------|--------------|--------------|-------------|
| 0.339183      | 0.419288      | 0.066279   | 0.566933     | 0.378621     | -0.15683     | -0.19965    |

**Supplementary Table S4:** The list of candidate genes, which have positive correlation with VIM in our laser capture micro dissected transcriptomic data

| <b>Symbol</b> | <b>Symbol</b> | <b>Symbol</b> |
|---------------|---------------|---------------|
| COL3A1        | ADAMTS2       | CD14          |
| COL1A2        | FERMT2        | CHN1          |
| IGFBP7        | NA            | MYLK          |
| SPARC         | CDH11         | GUCY1A3       |
| DCN           | GPNMB         | TAGLN         |
| COL5A2        | WISP1         | LOC100132891  |
| ACTA2         | PMP22         | A2M           |
| CTSK          | MSN           | TUBB6         |
| TIMP2         | NID2          | CD163         |
| FSTL1         | SPARCL1       | TNC           |
| COL12A1       | COL5A1        | FPR3          |
| COL4A1        | SRGN          | BCAT1         |
| LGALS1        | CRISPLD2      | SERPINF1      |
| COL6A3        | ADAMTS12      | CTSL          |
| AXL           | GUCY1B3       | LOX           |
| RFTN1         | FRMD6         | TMEM204       |
| SDC2          | CYBRD1        | CTGF          |
| FBN1          | MEIS1         | ADAM12        |
| DKK3          | LUM           | ATP8B2        |
| DDR2          | THY1          | PRRX1         |
| C1S           | INHBA         | PRR16         |
| POSTN         | CTHRC1        | LHFP          |
| ANTXR1        | GLT8D2        | CTSC          |
| MSRB3         | COL15A1       | SERPING1      |
| VCAN          | LAPTM5        | HEG1          |
| RAB31         | PDLIM3        | FN1           |
| CALD1         | MS4A4A        | GPR176        |
| NRP1          | COL8A1        |               |
| SNAI2         | FILIP1L       |               |
| SULF1         | LPHN2         |               |

**Supplementary Table S5:** The list of candidate EMT genes which were upregulated in cancer vs. normal and these were used for lasso cox regression model

| <b>Symbol</b> |
|---------------|
| COL3A1        |
| COL1A2        |
| IGFBP7        |
| SPARC         |
| COL5A2        |
| CTSK          |
| FSTL1         |
| COL4A1        |
| LGALS1        |
| COL6A3        |
| FBN1          |
| DKK3          |
| POSTN         |
| ANTXR1        |
| VCAN          |
| RAB31         |
| NRP1          |
| SULF1         |
| ADAMTS2       |
| CDH11         |
| WISP1         |
| NID2          |
| COL5A1        |
| LUM           |
| THY1          |
| INHBA         |
| COL8A1        |
| CHN1          |
| BCAT1         |
| LOX           |
| ADAM12        |
| PRRX1         |
| PRR16         |
| FN1           |

**Supplementary Table S6:** The AUC of each candidate gene for identifying CMS4 subtype in six publicly available datasets

|                        | <b>MATS</b> | <b>COL1A2</b> | <b>COL3A1</b> | <b>FN1</b> | <b>POSTN</b> | <b>FSTL1</b> | <b>BCAT1</b> | <b>DKK3</b> | <b>PRR16</b> |
|------------------------|-------------|---------------|---------------|------------|--------------|--------------|--------------|-------------|--------------|
| <b>GSE17536</b>        | 0.92        | 0.87          | 0.86          | 0.85       | 0.85         | 0.87         | 0.85         | 0.88        | 0.80         |
| <b>GSE33113</b>        | 0.99        | 0.86          | 0.87          | 0.82       | 0.90         | 0.95         | 0.89         | 0.90        | 0.65         |
| <b>GSE39582</b>        | 0.94        | 0.88          | 0.90          | 0.85       | 0.85         | 0.91         | 0.84         | 0.86        | 0.78         |
| <b>TCGA RNA seq</b>    | 0.97        | 0.93          | 0.94          | 0.89       | 0.91         | 0.97         | 0.92         | 0.92        | 0.89         |
| <b>TCGA microarray</b> | 0.95        | 0.92          | 0.83          | 0.81       | 0.86         | 0.93         | 0.82         | 0.91        | 0.85         |
| <b>GSE104645</b>       | 0.92        | 0.86          | 0.82          | 0.87       | 0.77         | 0.76         | 0.48         | 0.75        | 0.62         |



**Supplementary Figure S1**  
Study Design

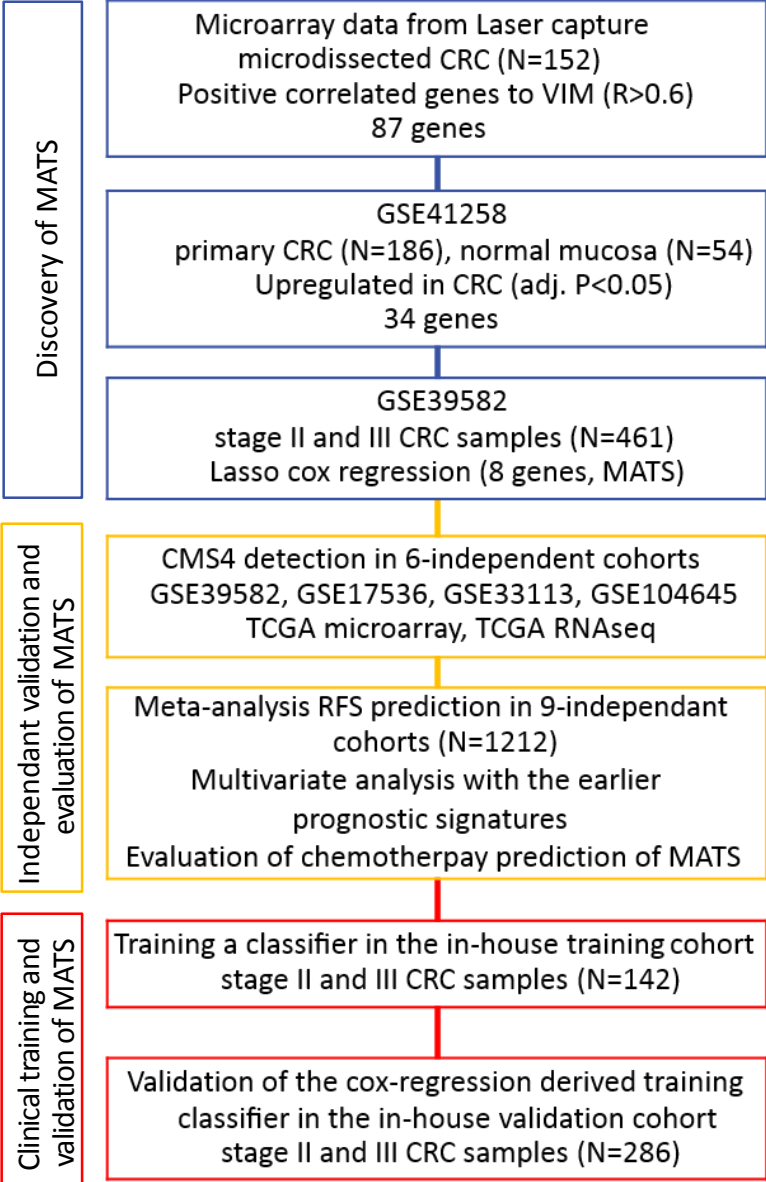

### Supplementary Figure S2:

The association between each MATS gene and CMS status in GSE39582 dataset.

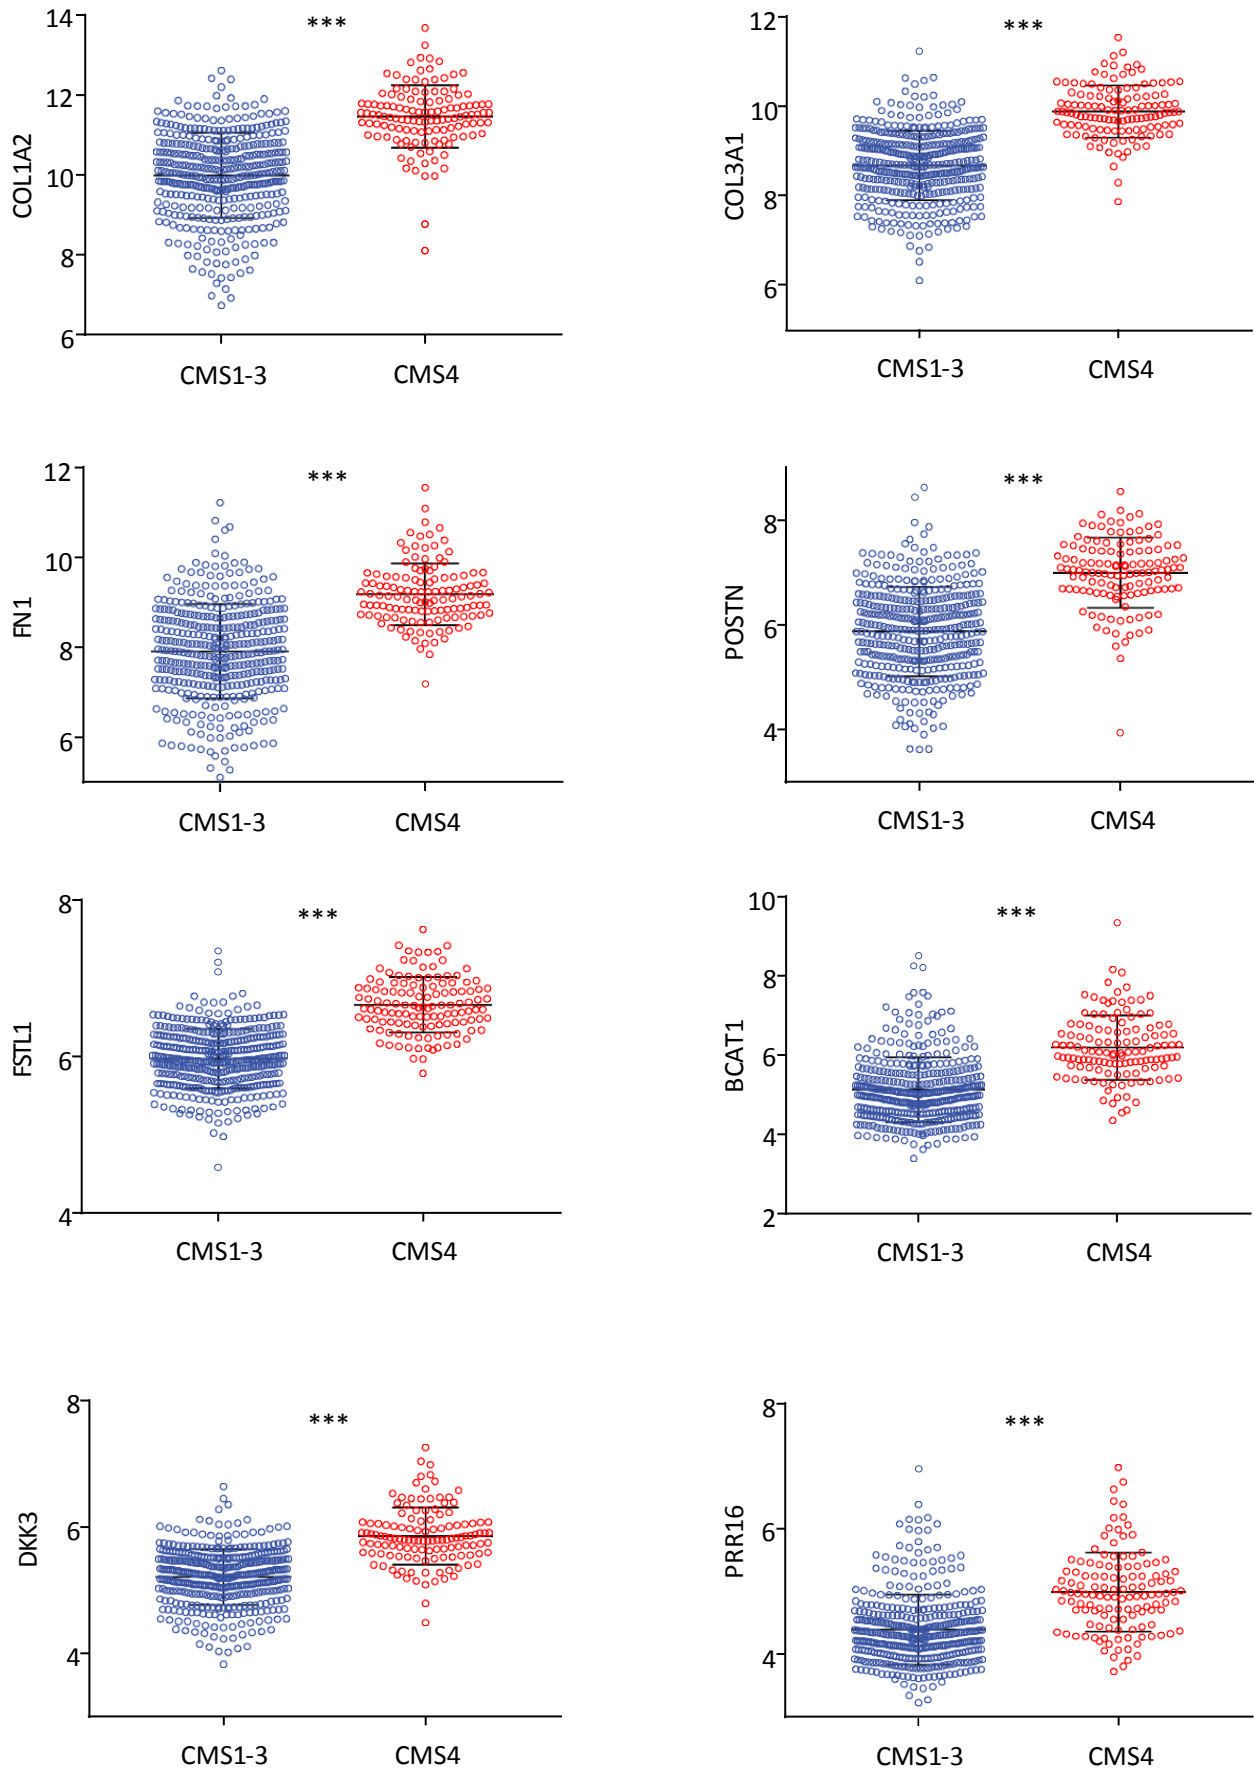

**Supplementary Figure S3:**

The association between each MATS gene and CMS status in GSE17536 dataset.

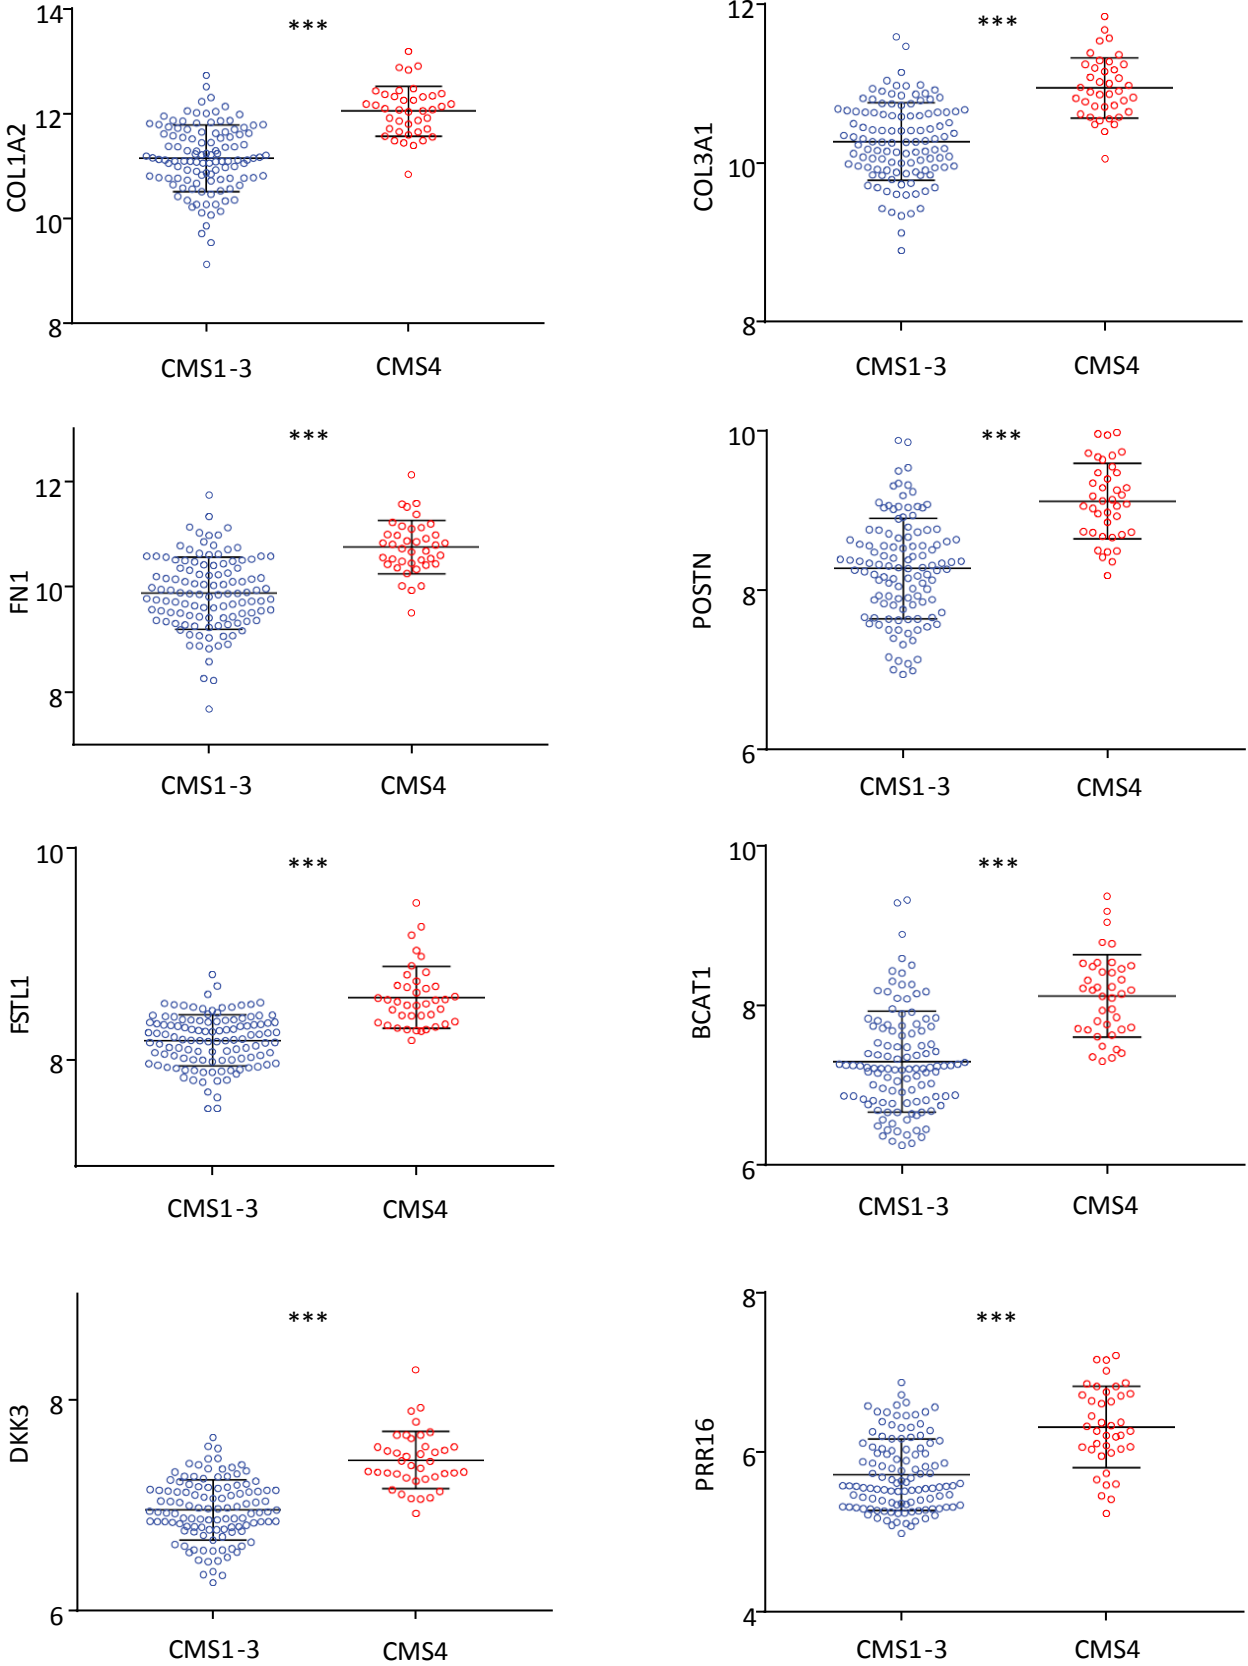

### Supplementary Figure S4:

The association between each MATS gene and CMS status in GSE33113 dataset.

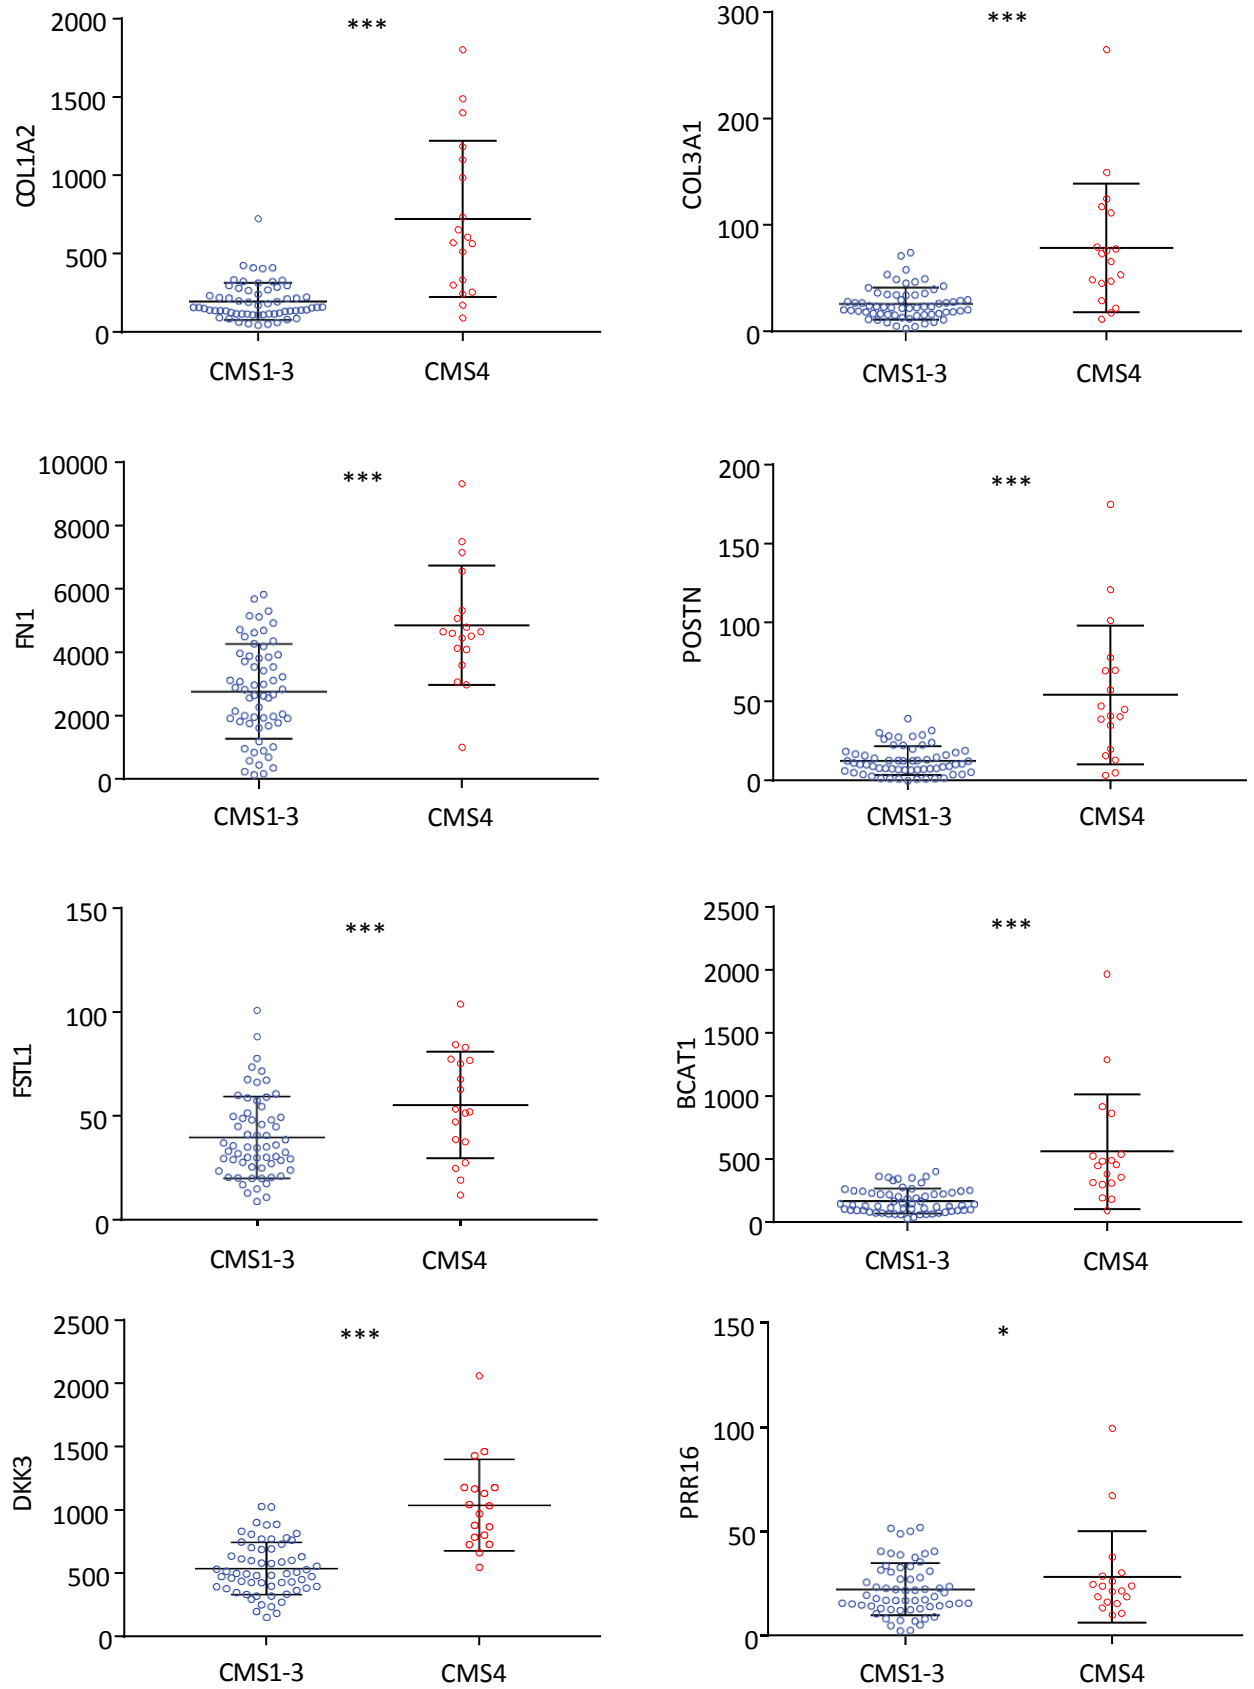

### Supplementary Figure S5:

The association between each MATS gene and CMS status in TCGA RNA seq dataset.

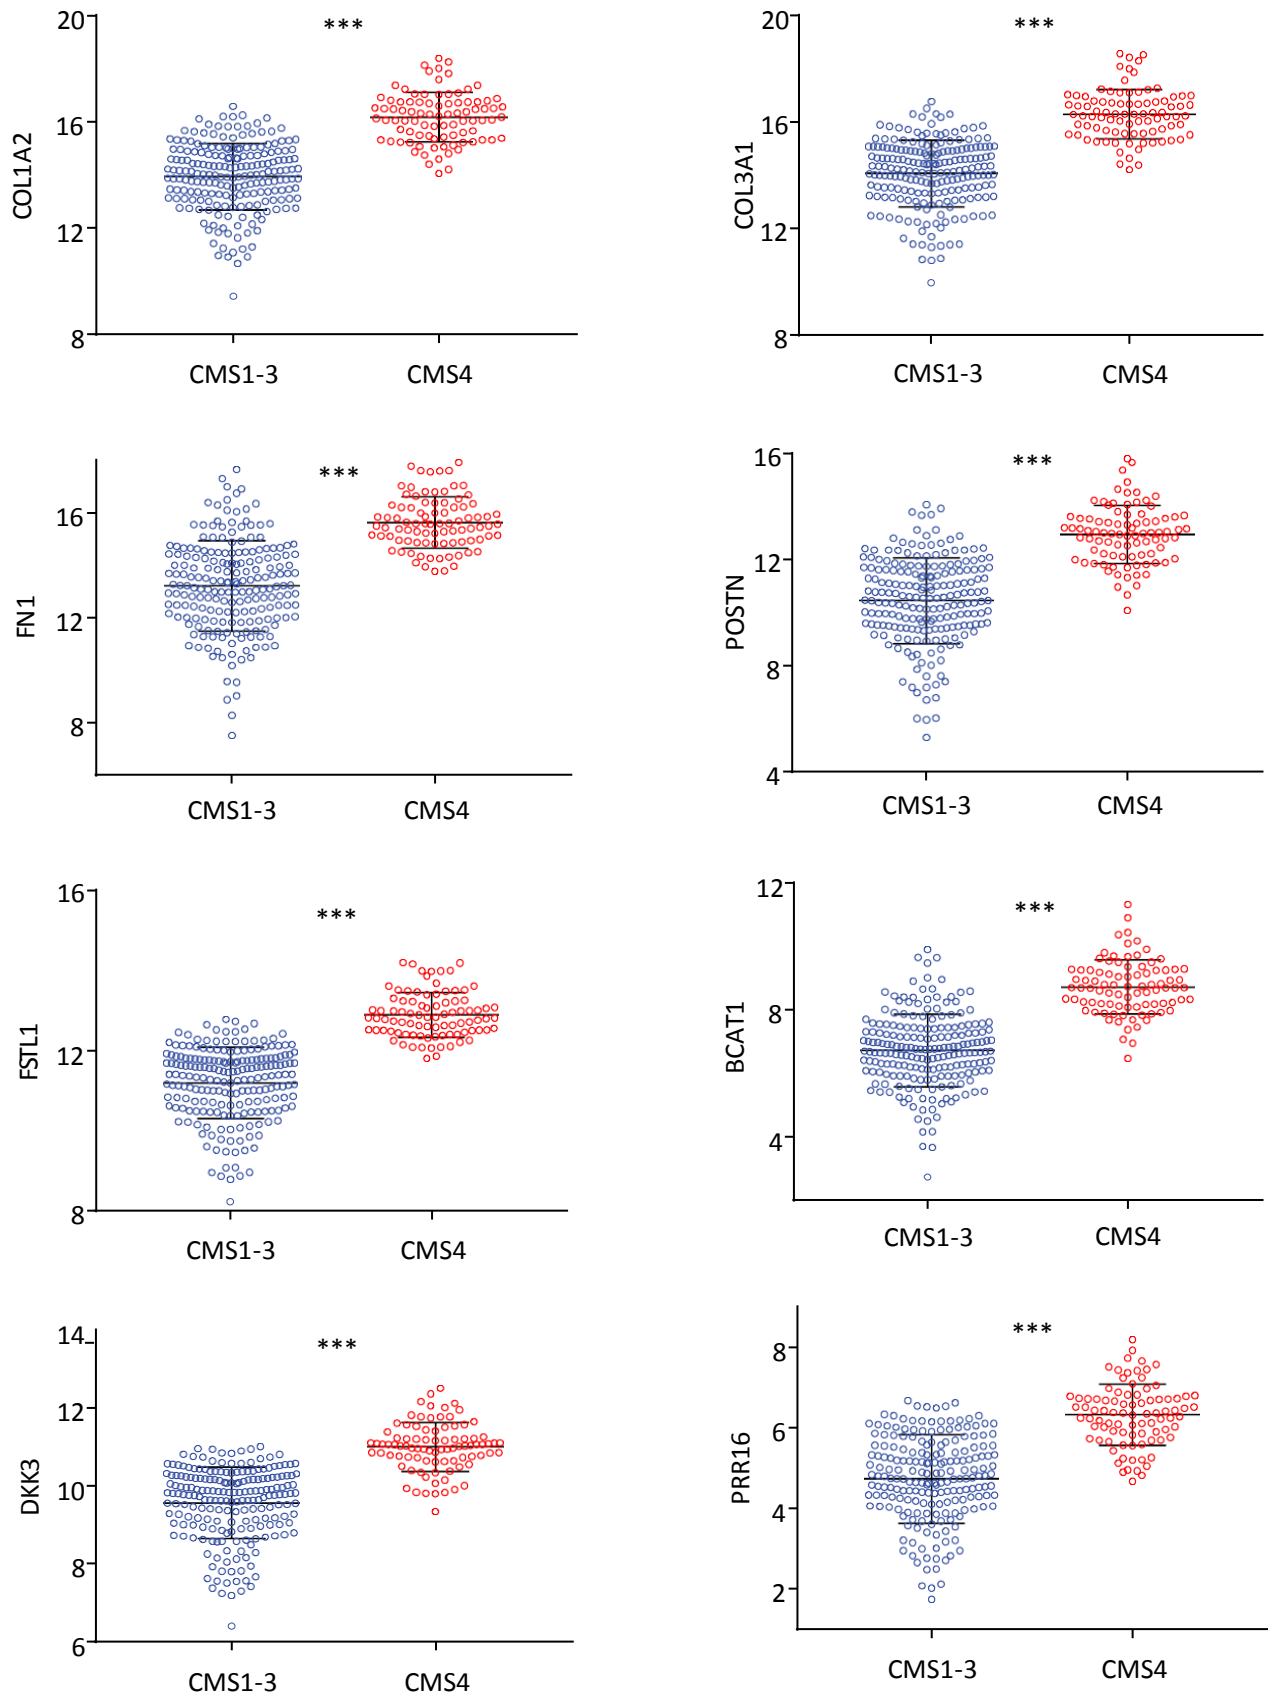

**Supplementary Figure S6:**

The association between each MATS gene and CMS status in TCGA microarray dataset.

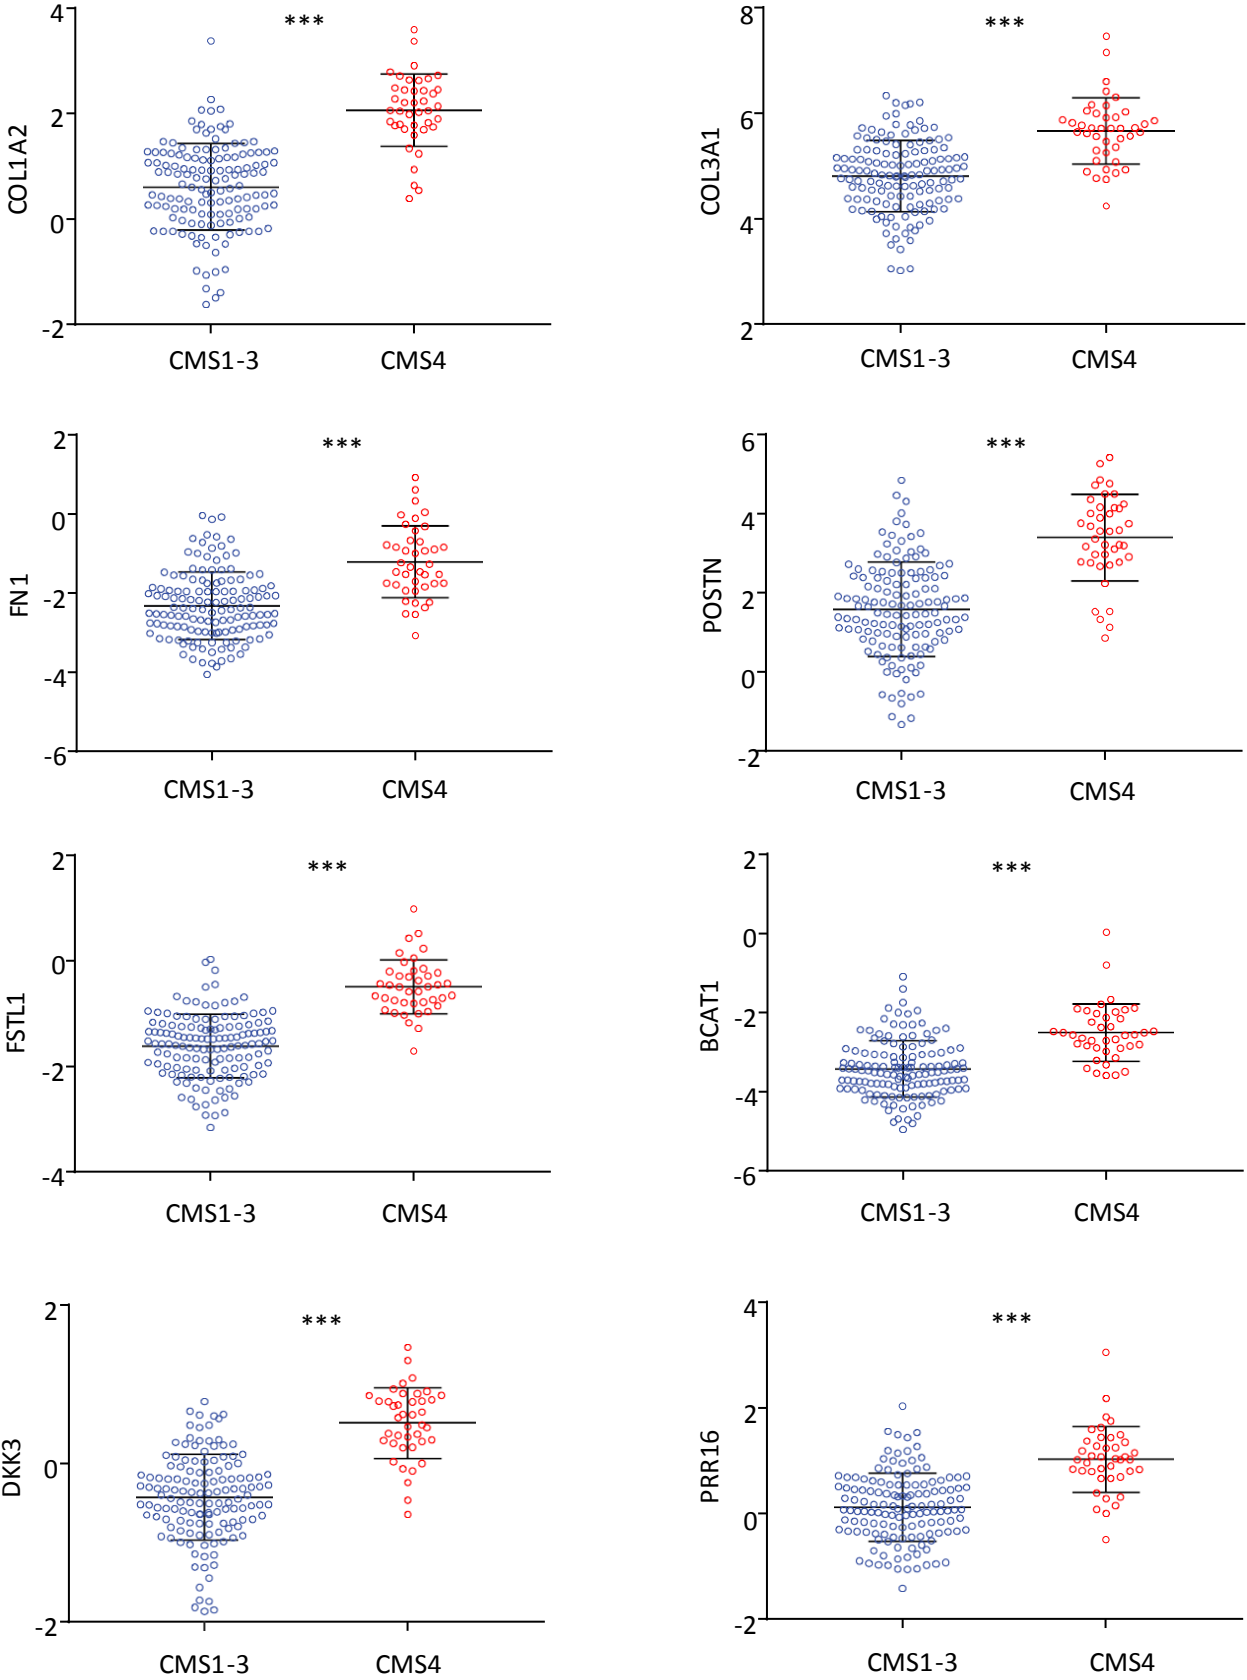

### Supplementary Figure S7:

The association between each MATS gene and CMS status in GSE104645 dataset.

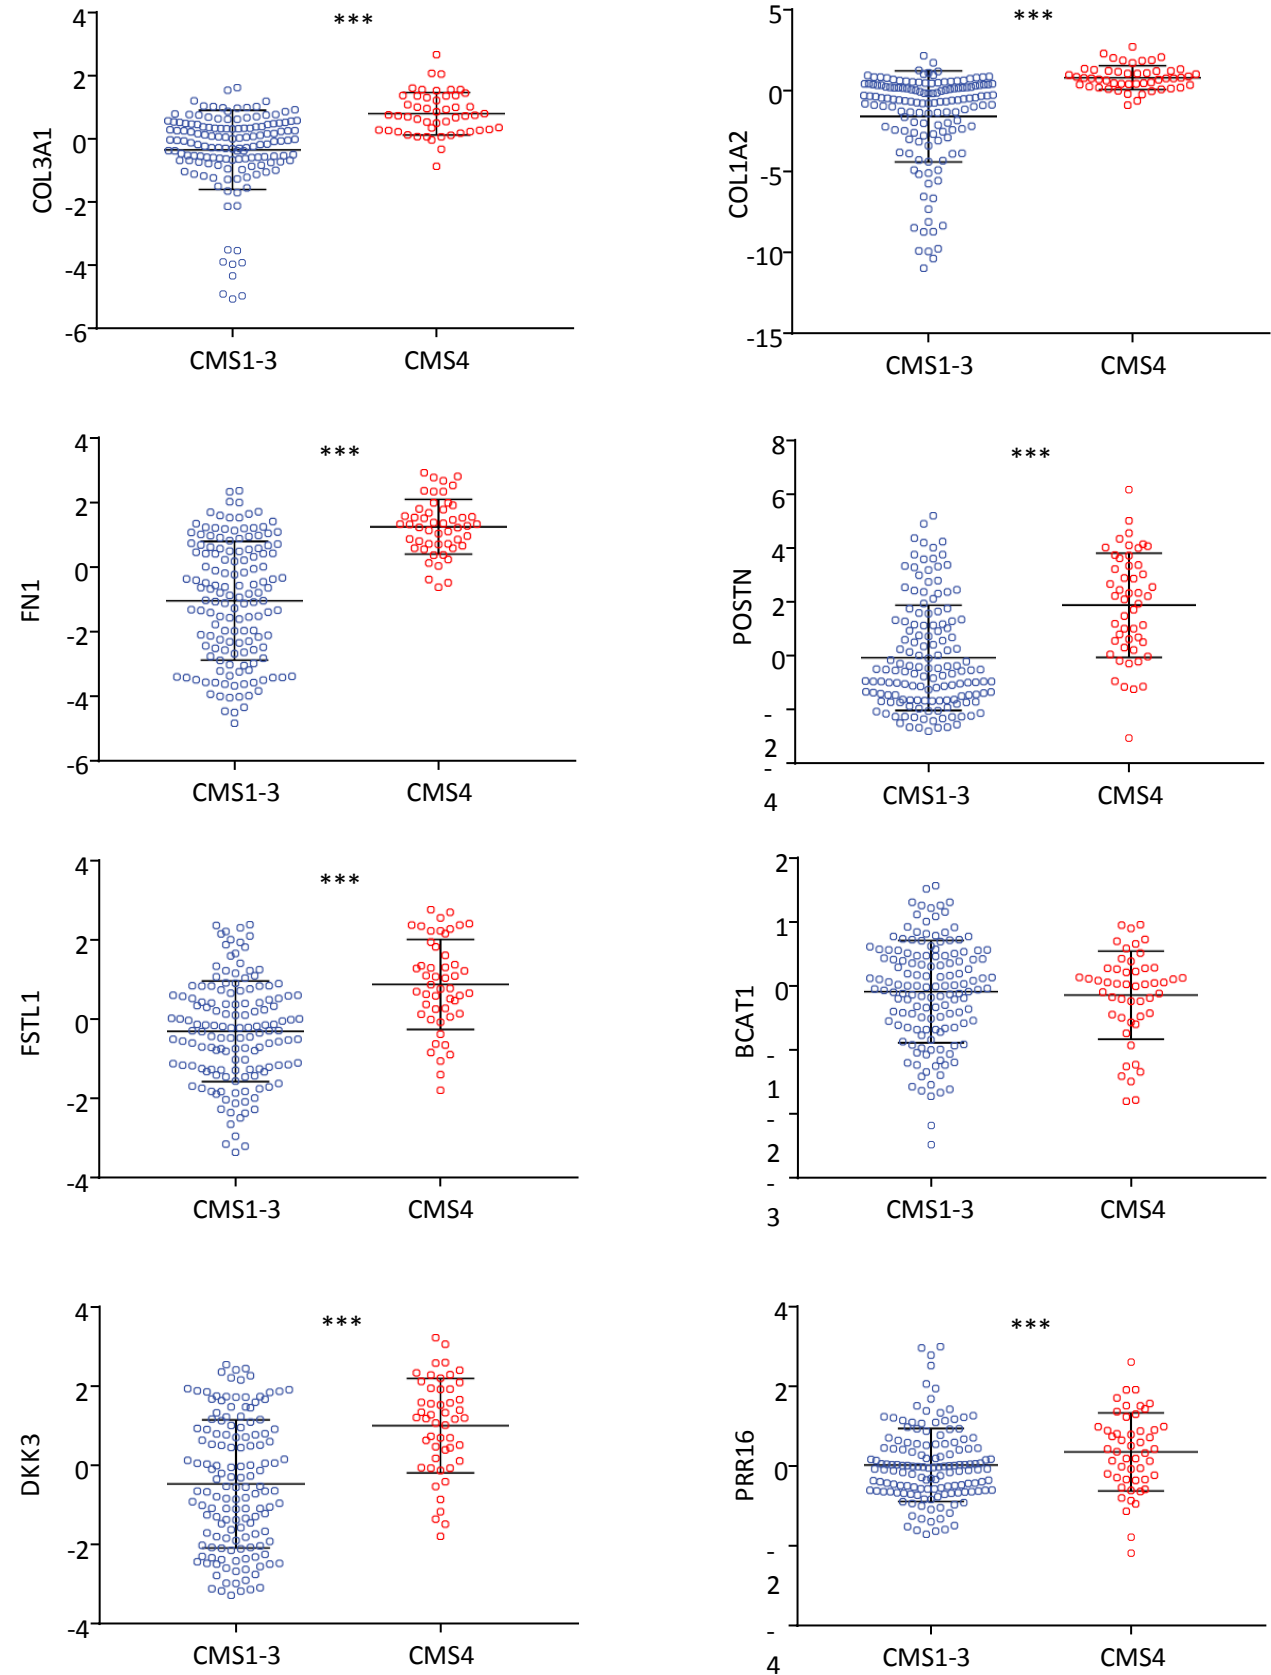

**Supplementary Figure S8:**

Association of MATS with TP53, BRAF and KRAS gene mutations status.

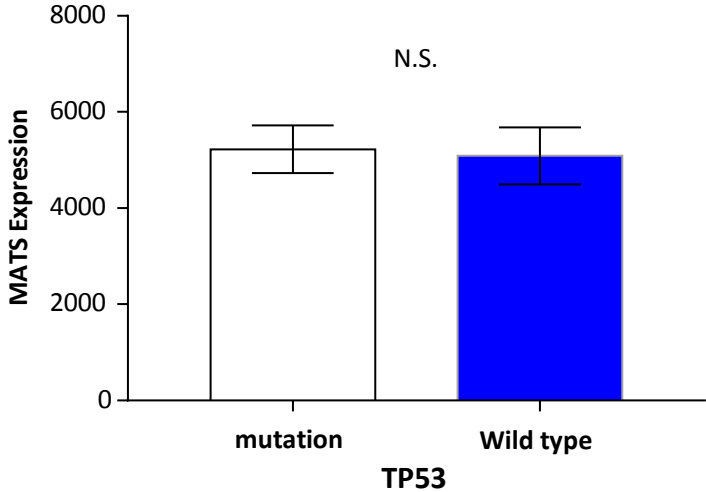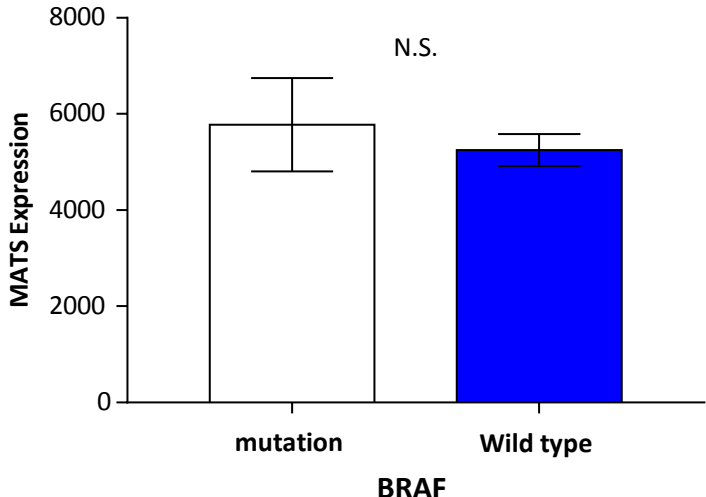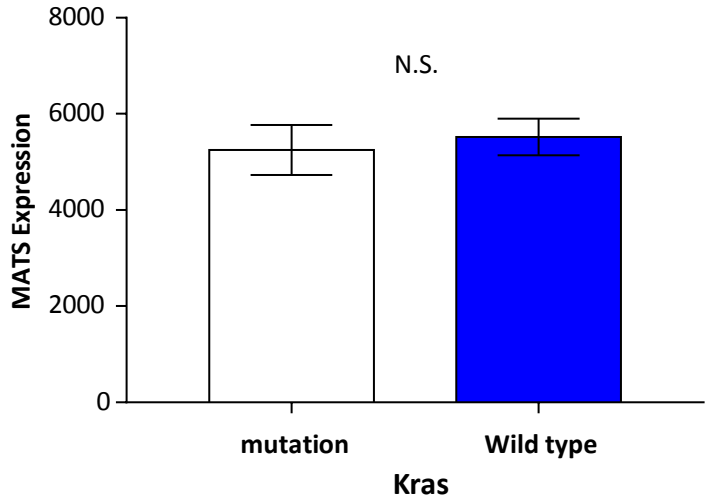



**Supplementary Figure S9:**

Kaplan-Meier survival analyses revealed MATS high risk group showed poorer RFS than those with low risk in stage II (A), and stage III (B) patients respectively in the validation cohort.

A

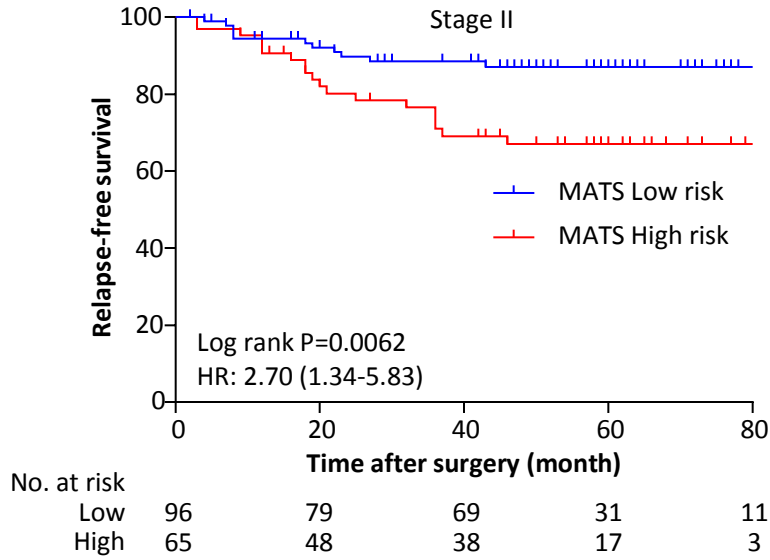

B

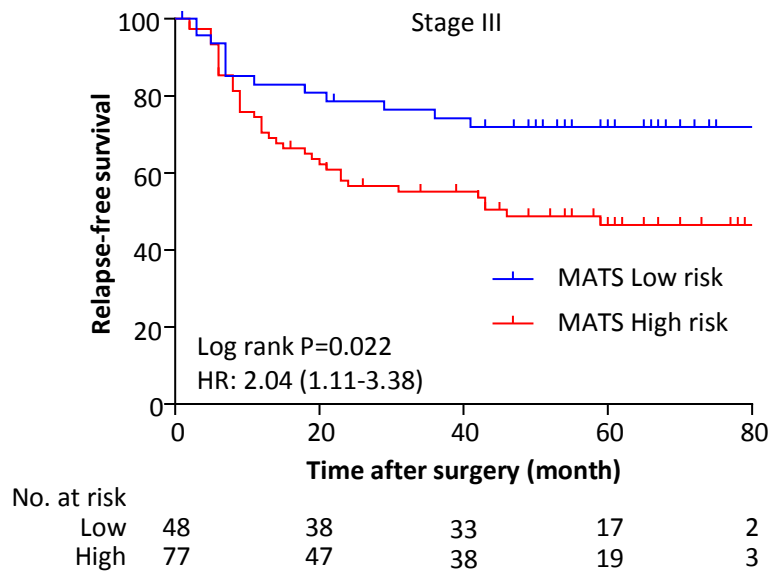

Supplement: NIHMS1812215-supplement-supinfo.pdf [file NIHMS1812215-supplement-supinfo.pdf]
